# Supplementary material
Source: ML conference proceedings conference paper supplement (https://proceedings.neurips.cc/paper_files/paper/2019/hash/2e6d9c6052e99fcdfa61d9b9da273ca2-Abstract.html)
Supplement: Supplementary file [file 2e6d9c6052e99fcdfa61d9b9da273ca2-Supplemental.zip]

# Practical Two-Step Look-ahead Bayesian Optimization

## Supplementary Material

### A Proof of Theorem 1

To prove Theorem 1, we need to prove the interchange of the expectation and the gradient operators is valid.

We fix  $X_1$  and  $\mathcal{A}(\delta)$ . We then choose  $i \in [q] = \{1, \dots, q\}$  representing a point within the first stage of points  $X_1$  and a component  $j \in [d] = \{1, \dots, d\}$  of that point. For real-valued  $\epsilon$ , we then let  $X_1(\epsilon)$  be  $X_1$  but with this component replaced by its sum with  $\epsilon$ . Then,

$$\widehat{2\text{-OPT}}_\delta(X_1(\epsilon), Z) = \max(f_0^* - \mu_0(X_1(\epsilon)) - C_0(X_1(\epsilon))Z)^+ + \text{EI}_1(X_1(\epsilon), x_2^*(\epsilon, Z), Z),$$

We then choose an open set  $\Theta \subset \mathbb{R}$  containing 0 such that  $K_0(X_1(\epsilon), X_1(\epsilon))$  and hence  $C_0(X_1(\epsilon))$  is (strictly) positive definite for each  $\epsilon \in \Theta$ . This is possible because  $K_0(X_1(0), X_1(0))$  was assumed positive definite. We also choose  $\Theta$  with the requirement that  $\sup_{\epsilon \in \Theta} |\epsilon| \leq \delta/2$ .

Here, we have modified our notation to  $x_2^*(\epsilon, Z) \in \text{argmin}_{x_2 \in \mathcal{A}} \text{EI}_1(X_1(\epsilon), x_2, Z)$  (called  $x_2^*$  in the body of the paper) to note dependence on  $\epsilon$  and  $Z$ .

With this notation, the claimed validity of this interchange can be restated as the claim that

$$\frac{\partial}{\partial \epsilon} \widehat{2\text{-OPT}}_\delta(X_1(\epsilon)) = \mathbb{E}_0 \left[ \frac{\partial}{\partial \epsilon} \widehat{2\text{-OPT}}_\delta(X_1(\epsilon), Z) \right] \quad (6)$$

To prove that (6) is valid, we use Theorem 1 in L'Ecuyer [1990]. This theorem requires three sufficient conditions:

- (i)  $\widehat{2\text{-OPT}}_\delta(X_1(\epsilon), Z)$  is continuous in  $\epsilon$  over  $\Theta$  for any fixed  $Z$ ;
- (ii)  $\widehat{2\text{-OPT}}_\delta(X_1(\epsilon), Z)$  is differentiable in  $\epsilon$  except on a denumerable set in  $\Theta$  for any given  $Z$ ;
- (iii) the derivative of  $\widehat{2\text{-OPT}}_\delta(X_1(\epsilon), Z)$  with respect to  $\epsilon$  (when it exists) is uniformly bounded by a random variable  $M(Z)$  for all  $\epsilon \in \Theta$  and the expectation of  $M(Z)$  is finite.

Before proving these conditions, we first state several lemmas.

**Lemma 1.**  $\text{EI}(m, v) = m\Phi(m/\sqrt{v}) + \sqrt{v}\varphi(m/\sqrt{v})$  is continuously differentiable in  $m, v$  for any  $m \in \mathbb{R}$  and any  $v$  in  $(0, \infty)$ .

*Proof.* The following expressions can be verified from direct differentiation, and also appear in slightly modified form in Jones et al. [1998]:

$$\frac{\partial}{\partial \sqrt{v}} \text{EI}(m, v) = \varphi\left(\frac{m}{\sqrt{v}}\right), \quad \frac{\partial}{\partial m} \text{EI}(m, v) = \Phi\left(\frac{m}{\sqrt{v}}\right)$$

The chain rule then implies

$$\frac{\partial}{\partial v} \text{EI}(m, v) = \frac{1}{2\sqrt{v}} \varphi\left(\frac{m}{\sqrt{v}}\right)$$

These expressions for  $\frac{\partial}{\partial m} \text{EI}(m, v)$  and  $\frac{\partial}{\partial v} \text{EI}(m, v)$  are continuous in  $m$  and  $v$  over the claimed ranges, which notably exclude  $v = 0$ .  $\square$

**Lemma 2.**  $K_1(x_2, \epsilon) := K_0(x_2) - K_0(x_2, X_1(\epsilon))K_0(X_1(\epsilon))^{-1}K_0(X_1(\epsilon), x_2)$  and  $\sigma_0(x_2, X_1(\epsilon))$  are continuously differentiable in  $x_2$  and  $\epsilon$  for all  $\epsilon \in \Theta$  and all  $x_2 \in \mathcal{A}(\delta)$ .

*Proof.* Recall  $\sigma_0(x_2, X_1(\epsilon)) = K_0(x_2, X_1(\epsilon))C_0(X_1(\epsilon))^{-1}$  and  $C_0(X_1(\epsilon))$  is the Cholesky decomposition of  $K_0(X_1(\epsilon))$ .

$K_0(X_1(\epsilon))$  is positive definite for all  $\epsilon \in \Theta$  (we chose  $\Theta$  so this would be true). Also, (1) the Cholesky decomposition is continuously differentiable Smith [1995]; (2) the matrix inverse is continuously differentiable for positive definite matrices; and (3)  $K_0$  is continuously differentiable. The result follows since compositions, products, and sums of continuously differentiable functions are continuously differentiable.  $\square$

**Lemma 3.**  $K_1(x_2, \epsilon)$  is bounded below by a strictly positive constant  $r > 0$  across all  $x_2 \in \mathcal{A}(\delta)$  and all  $\epsilon \in \Theta$ .

*Proof.* All points in  $\mathcal{A}(\delta)$  have  $K_0(x_2) > 0$ . Also, since  $\epsilon \leq \delta/2$  for all  $\epsilon \in \Theta$  (we chose  $\Theta$  so this would be true), all points in  $\mathcal{A}(\delta)$  are separated from all points in  $X_1(\epsilon)$  by at least  $\delta - \epsilon \geq \delta/2 > 0$ . Thus, by the assumption that the kernel is non-degenerate in the statement of the theorem, the posterior variance  $K_1(x_2, \epsilon)$  is strictly positive for all  $x_2 \in \mathcal{A}(\delta)$ .

Also,  $K_1(x_2, X_1(\epsilon))$  is continuous by Lemma 2. Thus, since  $\mathcal{A}(\delta)$  is compact, the infimum over  $x_2 \in \mathcal{A}(\delta)$  is attained within  $\mathcal{A}(\delta)$ . This infimum is thus strictly positive.  $\square$

**Lemma 4.** Consider any fixed  $Z$ . Then,  $\max_{x_2 \in \mathcal{A}(\delta)} \text{EI}_1(X_1(\epsilon), x_2, Z)$  is differentiable for almost every  $\epsilon \in \Theta$ . At each  $\epsilon_0$  for which this derivative exists, the derivative is equal to

$$\frac{d}{d\epsilon} \text{EI}_1(X_1(\epsilon), x_2^*(\epsilon_0, Z), Z), \quad (7)$$

where either  $x_2^*(\epsilon_0, Z) \in \arg\min_{x_2 \in \mathcal{A}(\delta)} \text{EI}_1(X_1(\epsilon_0), x_2, Z)$  is unique or (7) does not depend on the choice within this set.

*Proof.* To show this result, the envelope theorem (Corollary 4 of Milgrom and Segal 2002) tells us that it is sufficient to verify the following conditions:

1.  $\mathcal{A}(\delta)$  is a non-empty compact space;
2.  $\text{EI}_1(X_1(\epsilon), x_2, Z)$  is continuous in  $x_2$ ;
3.  $\frac{d}{d\epsilon} \text{EI}_1(X_1(\epsilon), x_2, Z)$  is continuous in  $\epsilon$  and  $x_2$ .

This will then imply absolute continuity of  $\max_{x_2 \in \mathcal{A}(\delta)} \text{EI}_1(X_1(\epsilon), x_2, Z)$  (implying differentiability for almost every  $\epsilon$ ) and the claimed expression for the derivative.

The first condition is assumed in the statement of Theorem 1.

We now verify the second and third conditions. Recall that

$$\text{EI}_1(X_1(\epsilon), x_2, Z) = \text{EI}(f_1^* - \mu_0(x_2) - \sigma_0(x_2, X_1(\epsilon))Z, K_1(x_2, \epsilon))$$

The second condition follows from continuity of EI (Lemma 1),  $\mu_0$  (assumed in the statement of the Theorem),  $\sigma_0(x_2, X_1(\epsilon))$  (Lemma 2), and  $K_1(x_2, \epsilon)$  (Lemma 2).

The third condition follows from the fact that  $K_1(x_2, \epsilon)$  stays bounded away from 0 (Lemma 3),  $\text{EI}(m, v)$  is continuously differentiable when  $v > 0$  (Lemma 1), continuous differentiability of  $\mu_0(x_2)$  (assumed in the statement of the Theorem), and continuous differentiability of  $\sigma_0(x_2, X_1(\epsilon))$  and  $K_1(x_2, \epsilon)$  (Lemma 2).  $\square$

With these lemmas, we now proceed to show the conditions required by L'Ecuyer [1990].

### A.1 Proof of condition (i)

Because the the mean function  $\mu_0$  and the kernel  $K_0$  are assumed continuous,  $\mu_0(X_1(\epsilon))$  and  $C_0(X_1(\epsilon))$  are continuous in  $\epsilon$ .

Since the maximum of several continuous functions is continuous,  $\max(f_0^* - \mu_0(X_1(\epsilon)) - C_0(X_1(\epsilon))Z)^+$  is continuous in  $\epsilon$ .

Continuity of  $\text{EI}_1(X_1(\epsilon), x_2^*(\epsilon, Z), Z)$  was shown in Lemma 4.

Since the sum of continuous functions is continuous,  $\widehat{2\text{-OPT}}_\delta(X_1(\epsilon), Z)$  is continuous in  $\epsilon$ .

## A.2 Proof of condition (ii)

Fix any  $Z$ . Leveraging Lemma 4, it is sufficient to show that  $\max(f_0^* - \mu_0(X_1(\epsilon)) - C_0(X_1(\epsilon))Z)^+ + \text{EI}_1(X_1(\epsilon), x_2^*, Z)$  is differentiable with respect to  $\epsilon$  except on a denumerable set in  $\Theta$ .

Let  $D \subseteq \Theta$  be the set of values of  $\epsilon$  such that  $\max(f_0^* - \mu_0(X_1(\epsilon)) - C_0(X_1(\epsilon))Z)^+$  is not differentiable. We have

$$D \subset \bigcup_{i,j \in 0:q} \left\{ \epsilon \in \Theta : h_i(\epsilon) = h_j(\epsilon), \frac{dh_\epsilon(i)}{d\epsilon} \neq \frac{dh_j(\epsilon)}{d\epsilon} \right\}$$

where  $h_0(\epsilon) = 0$  and  $h_i(\epsilon)$  for  $i > 0$  is a component  $i$  of  $f_0^* - \mu_0(X_1(\epsilon)) - C_0(X_1(\epsilon))Z$ . Thus it is sufficient to show that

$$\left\{ \epsilon \in \Theta : h_i(\epsilon) = h_j(\epsilon), \frac{dh_\epsilon(i)}{d\epsilon} \neq \frac{dh_j(\epsilon)}{d\epsilon} \right\}$$

is denumerable.

Define  $\eta(\epsilon) := h_i(\epsilon) - h_j(\epsilon)$ . Observe that differentiability of  $\mu_0$  and  $K_0$  imply differentiability of  $\eta$ . We would like to show that  $E := \left\{ \epsilon \in \Theta : \eta(\epsilon) = 0, \frac{d\eta(\epsilon)}{d\epsilon} \neq 0 \right\}$  is denumerable. To prove this, it is sufficient to show that  $E$  contains only isolated points because any set of isolated points in  $\mathbb{R}$  is denumerable (see the proof of statement 4.2.25 on page 165 in Thomson et al. [2008]).

We prove that  $E$  only contains isolated points by contradiction. Suppose that  $\epsilon_* \in E$  is not an isolated point. Then, there is a sequence of points  $\epsilon_1, \epsilon_2, \dots$  in  $E$  that converge to  $\epsilon_*$ . Then, noting that  $\eta(\epsilon_n) = \eta(\epsilon) = 0$ , we have

$$0 \neq \frac{d\eta(\epsilon)}{d\epsilon} \Big|_{\epsilon=\epsilon_*} = \lim_{n \rightarrow \infty} \frac{\eta(\epsilon_n) - \eta(\epsilon_*)}{\epsilon_n - \epsilon_*} = \lim_{n \rightarrow \infty} 0 = 0,$$

which is a contradiction. Thus we may conclude that  $E$  only contains isolated points, and so is denumerable.

## A.3 Proof of condition (iii)

We first prove that  $\frac{\partial}{\partial \epsilon} \max(f_0^* - \mu_0(X_1(\epsilon)) - C_0(X_1(\epsilon))Z)^+$ , when it exists, has a magnitude bounded above by

$$\left| \frac{\partial}{\partial \epsilon} \max(f_0^* - \mu_0(X_1(\epsilon)) - C_0(X_1(\epsilon))Z)^+ \right| \leq M_1 + M_2 \sum_i |Z_i|$$

where  $M_1$  is the maximum of the absolute value of the derivatives of the components of  $\mu_0(X_1)$  with respect to  $\epsilon$  and, similarly,  $M_2$  is the maximum of the absolute value of the derivative of the entries of  $C_0(X_1)$  with respect to  $\epsilon$ . Because  $\mu_0$  and  $K_0$  are both assumed continuously differentiable,  $M_1$  and  $M_2$  are finite. We then have that  $\mathbb{E}[M_1 + M_2 \sum_i |Z_i|]$  is finite.

We now concentrate on the second term in  $\widehat{2\text{-OPT}}_\delta(X_1(\epsilon), Z)$ . By Lemma 4, when it exists,  $\frac{\partial}{\partial \epsilon} \max_{x_2 \in \mathcal{A}} \text{EI}_1(X_1(\epsilon), x_2, Z) \Big|_{\epsilon=\epsilon_0} = \frac{\partial}{\partial \epsilon} \text{EI}_1(X_1(\epsilon), x_2^*(\epsilon_0, Z), Z) \Big|_{\epsilon=\epsilon_0}$ .

Recall that

$$\text{EI}_1(X_1(\epsilon), x_2, Z) = \text{EI}(\mu_0(x_2) + \sigma_0(x_2, X_1(\epsilon))Z, K_0(x_2) - \sigma_0(x_2, X_1(\epsilon))\sigma_0(x_2, X_1(\epsilon))^T).$$

We will bound the derivative of this quantity with respect to  $\epsilon$  by a constant.

In the proof of Lemma 4, we showed that  $\frac{\partial}{\partial \epsilon} \sigma_0(x_2, X_1(\epsilon))$  is continuous in  $x_2$  and  $\epsilon$ , and so its components are bounded over  $\Theta$  (since we assumed  $\Theta$  is contained in a compact set). This bound does not depend on  $Z$ . Call this constant  $M_3$ .

We then use the chain rule to provide an expression for  $\frac{\partial}{\partial \epsilon} \text{EI}_1(X_1(\epsilon), x_2, Z)$ . Recalling that  $\text{EI}_1(X_1(\epsilon), x_2, Z)$  can be written more explicitly as  $\text{EI}(f_1^* - \mu_0(x_2) - \sigma_0(x_2, X_1)Z, K_1(x_2, \epsilon))$  we first note that the partial derivatives of EI with respect to its first and second arguments are non-negative (provided in Lemma 1) and can be bounded above by 1 and  $\varphi(0)/2\sqrt{r}$  respectively (leveraging Lemma 3). The derivative of the first argument with respect to  $\epsilon$  is the sum of:

- the derivative of  $f_1^* = \min(f_0^*, \min \mu_0(X_1(\epsilon) + C_0(X_1(\epsilon))Z)$ , whose absolute value is bounded by the largest component of  $\frac{\partial}{\partial \epsilon} \mu_0(X_1(\epsilon)) + C_0(X_1(\epsilon))Z$ ;
- $\frac{\partial}{\partial \epsilon} \sigma_0(x_2, X_1(\epsilon))Z$ .

Since  $\mu_0$ ,  $C_0$ , and  $\sigma_0$  are all continuously differentiable in  $\epsilon$ ,  $\Theta$  is contained within a compact set, and the maximum of a continuous function over a compact set is finite, the magnitude of these quantities can all be bounded above by a finite constant times  $|Z|$ .

The derivative of the second argument is continuous in  $\epsilon$  (Lemma 2) and so has a maximum that is similarly bounded above by a constant over  $\Theta$ .

Thus,  $|\frac{\partial}{\partial \epsilon} \text{EI}_1(X_1(\epsilon), x_2, Z)|$  is bounded above by a linear function  $|Z|$ , and a linear function of  $|Z|$  is integrable.

## B Additional Experiments

Here we include plots of numerical experiments discussed in the main paper, but that could not be included there due to space constraints. Figure 4 shows computation time compared with EI, KG, and GLASSES. Figure 5 shows mean performance across a collection of 8 widely used synthetic benchmarks against common one-step heuristics.

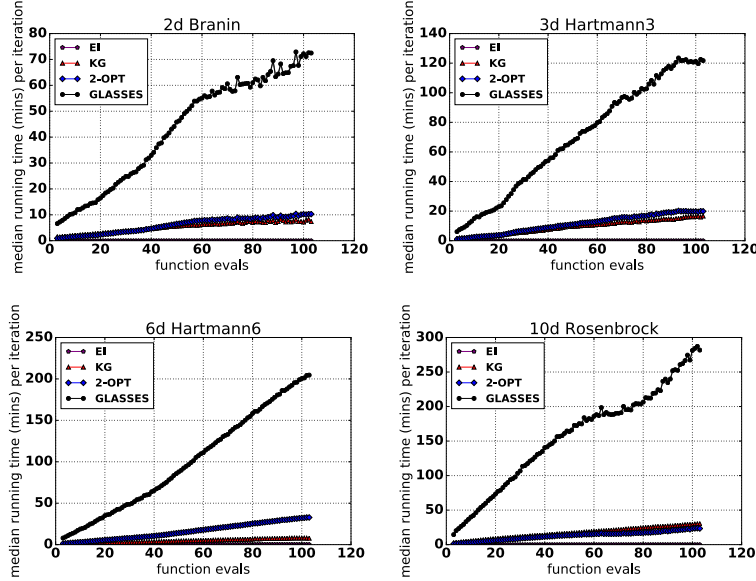

Figure 4: Run time benchmarks: 2-OPT is clear better than GLASSES and comparable to popular one-step heuristics.

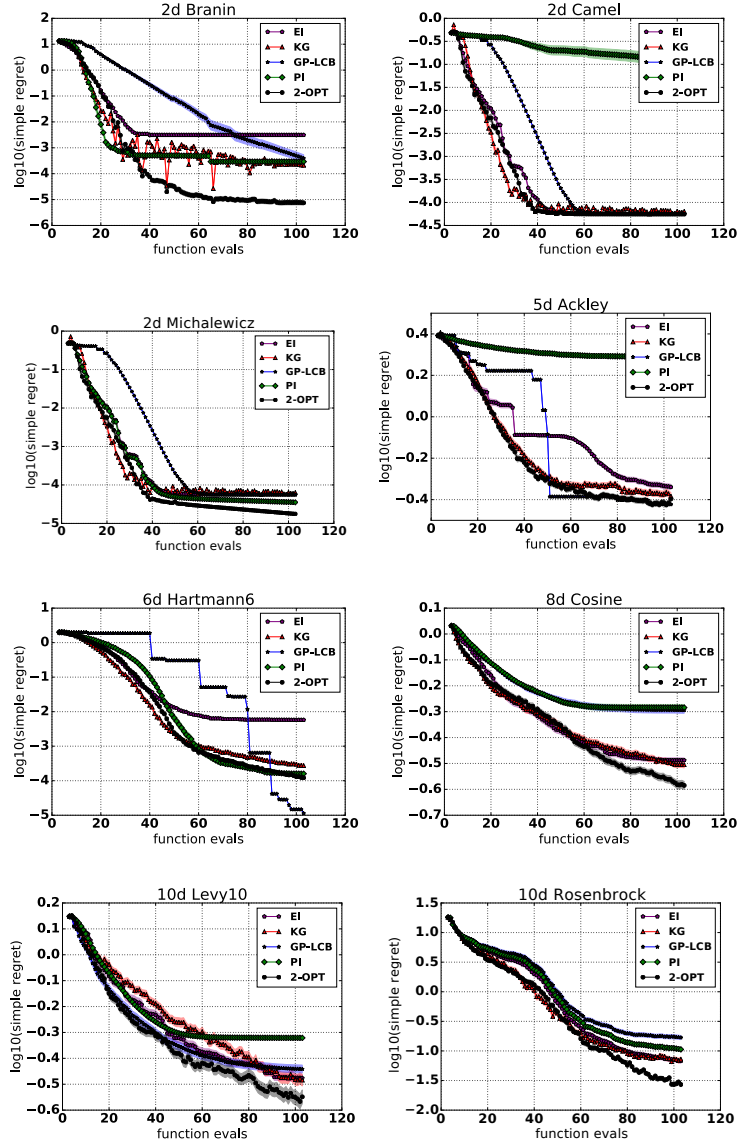

Figure 5: Benchmarks of 2-OPT with common one-step heuristics: EI, PI, KG and GP-LCB on eight common synthetic functions. 2-OPT outperforms the competitors on 7 out of 8 test functions, although some of the one-step algorithms are known to be highly effective on these functions.
